# Supplementary figures and images for: A nuclear factor-κB signaling pathway via protein kinase C δ regulates replication of respiratory syncytial virus in polarized normal human nasal epithelial cells
Source: PubMed Central journal article supplement — Mol Biol Cell. 2011 Jul 1;22(13):2144–56. doi: 10.1091/mbc.E10-11-0875 (PMC3128518; doi:10.1091/mbc.e10-11-0875), 2011-07-01

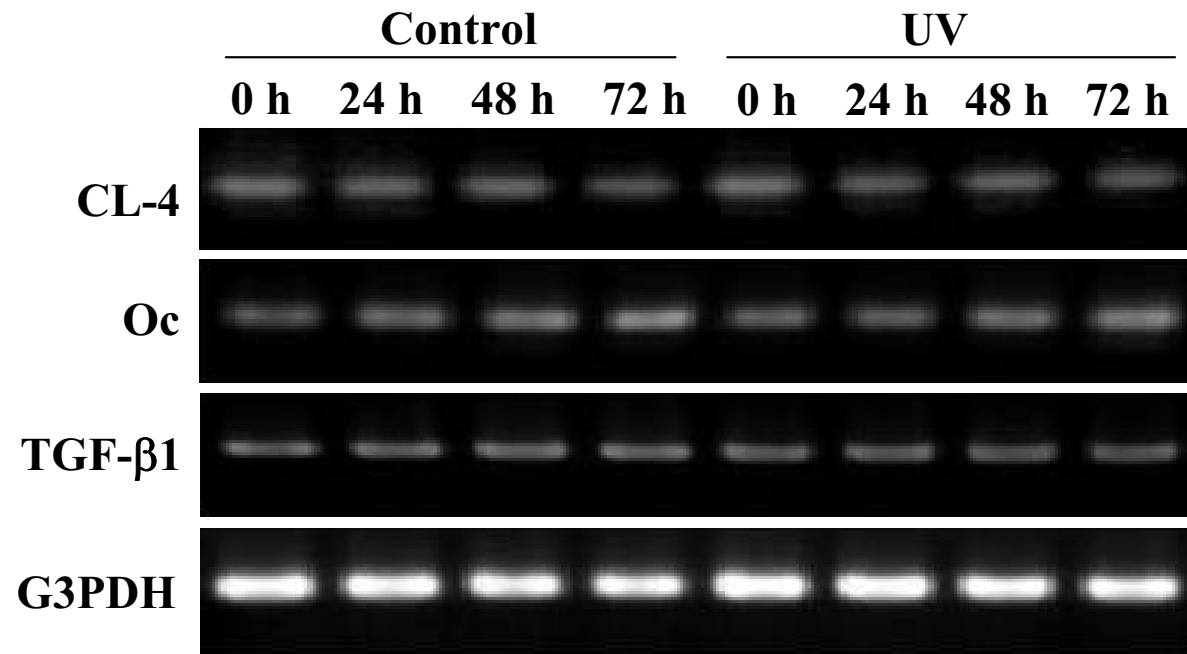

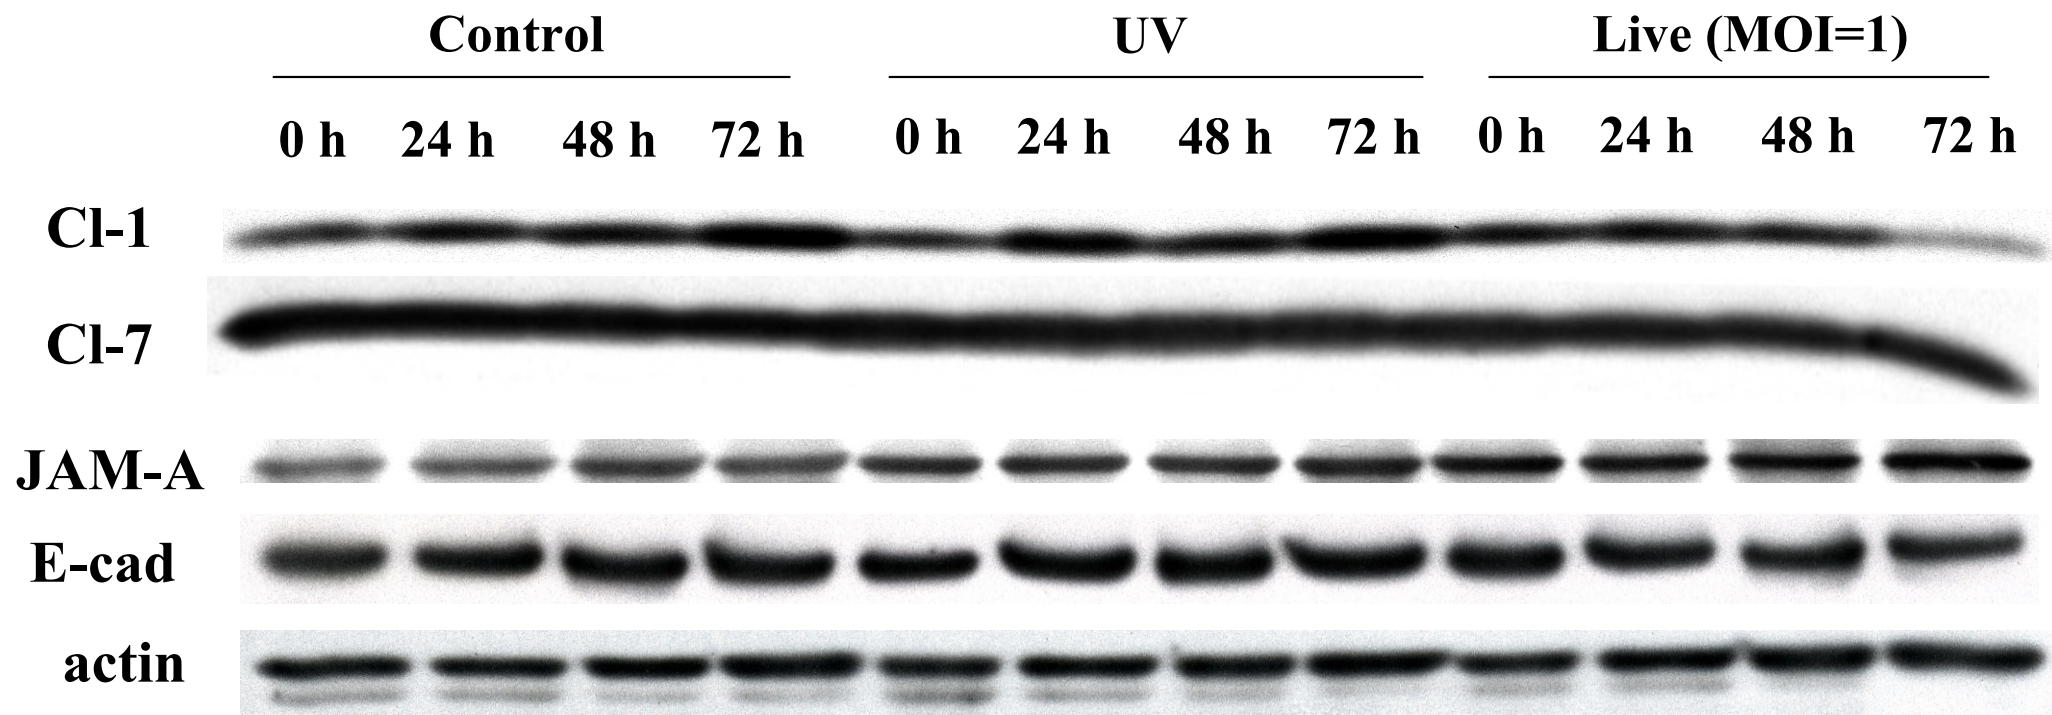

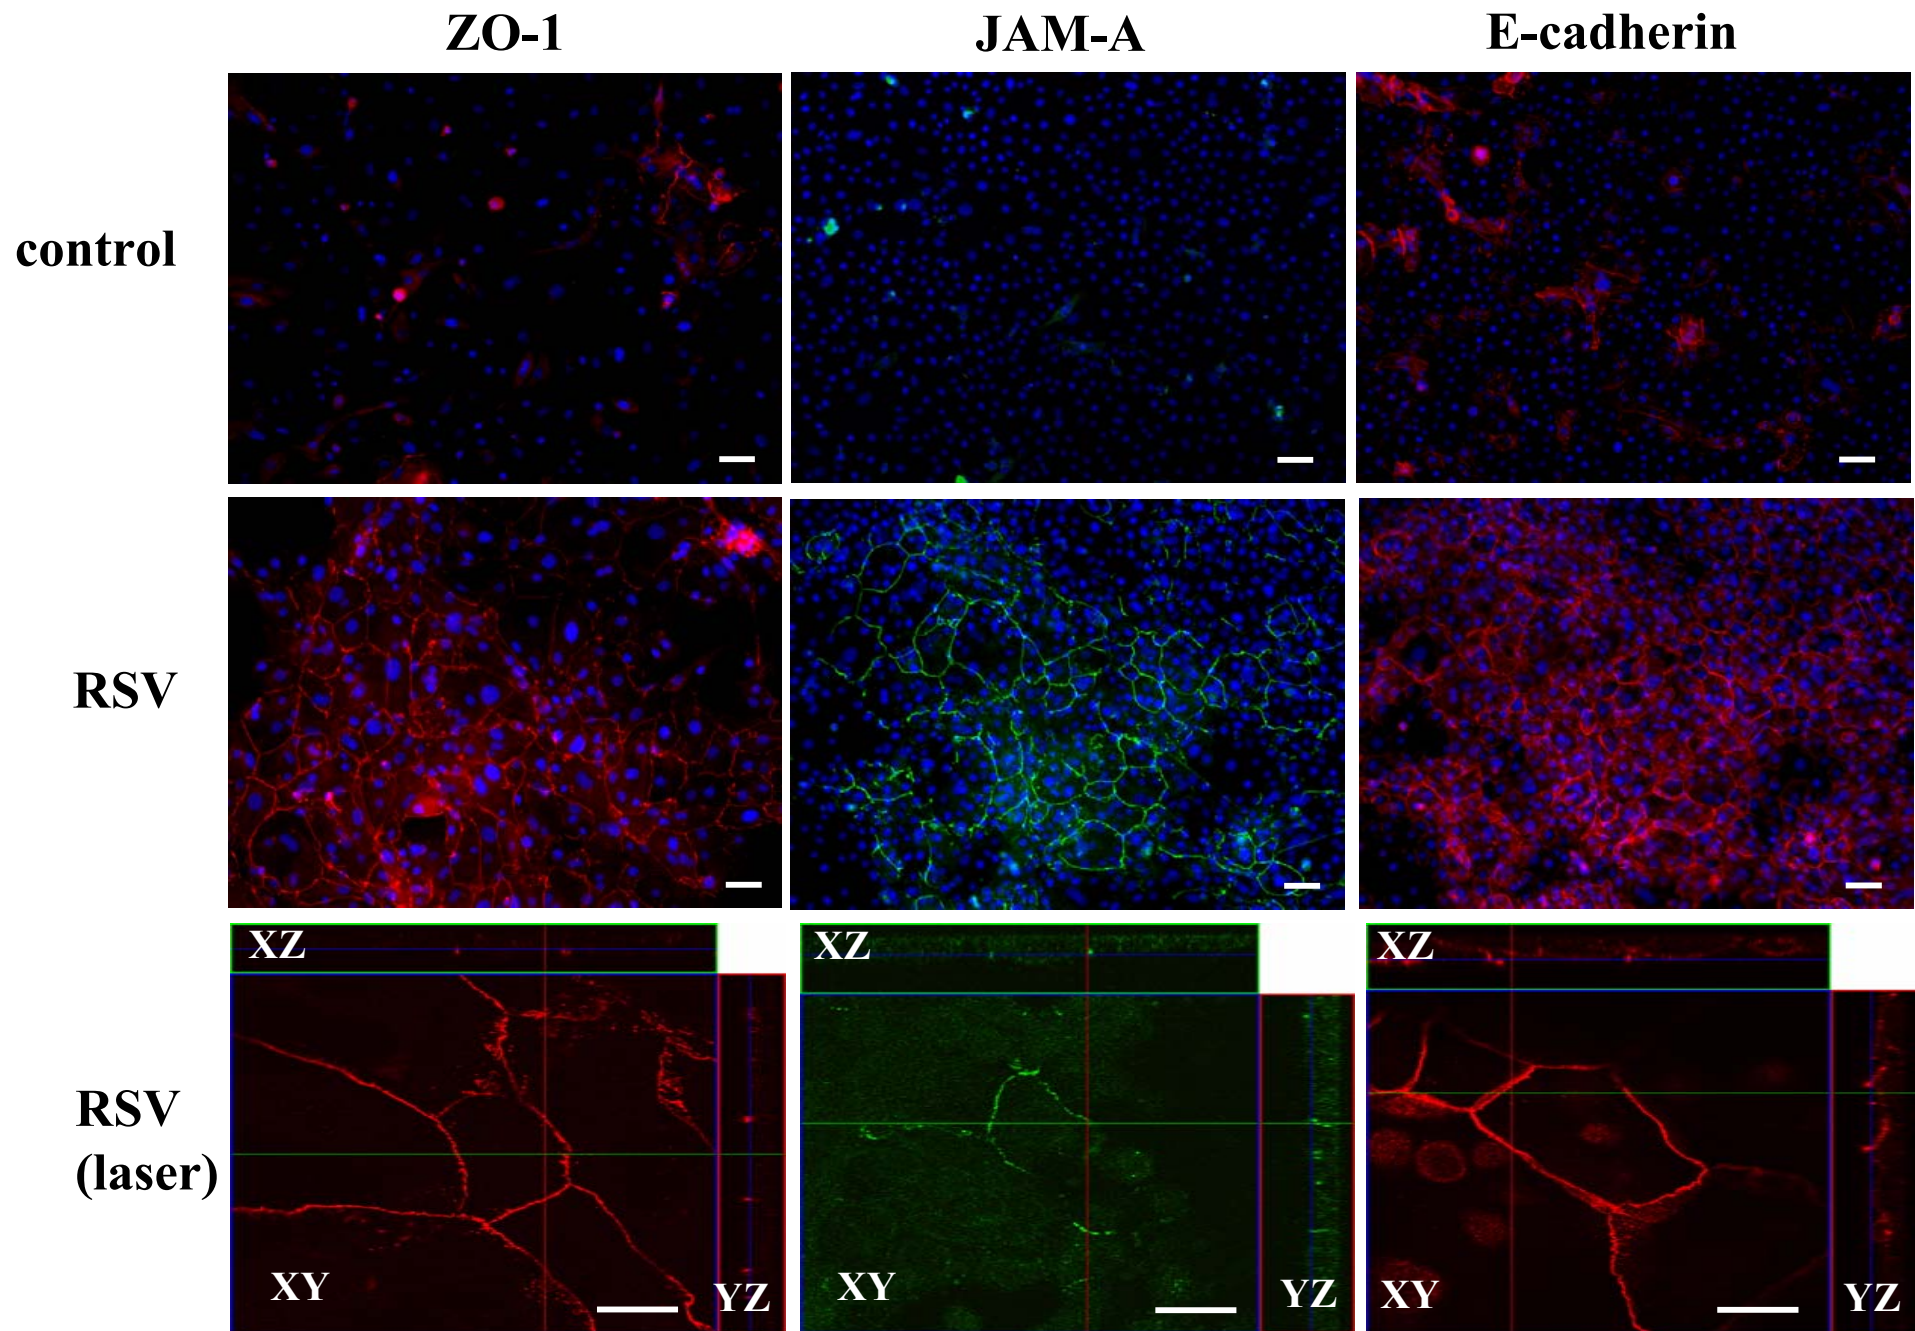

Supplemental Fig.3

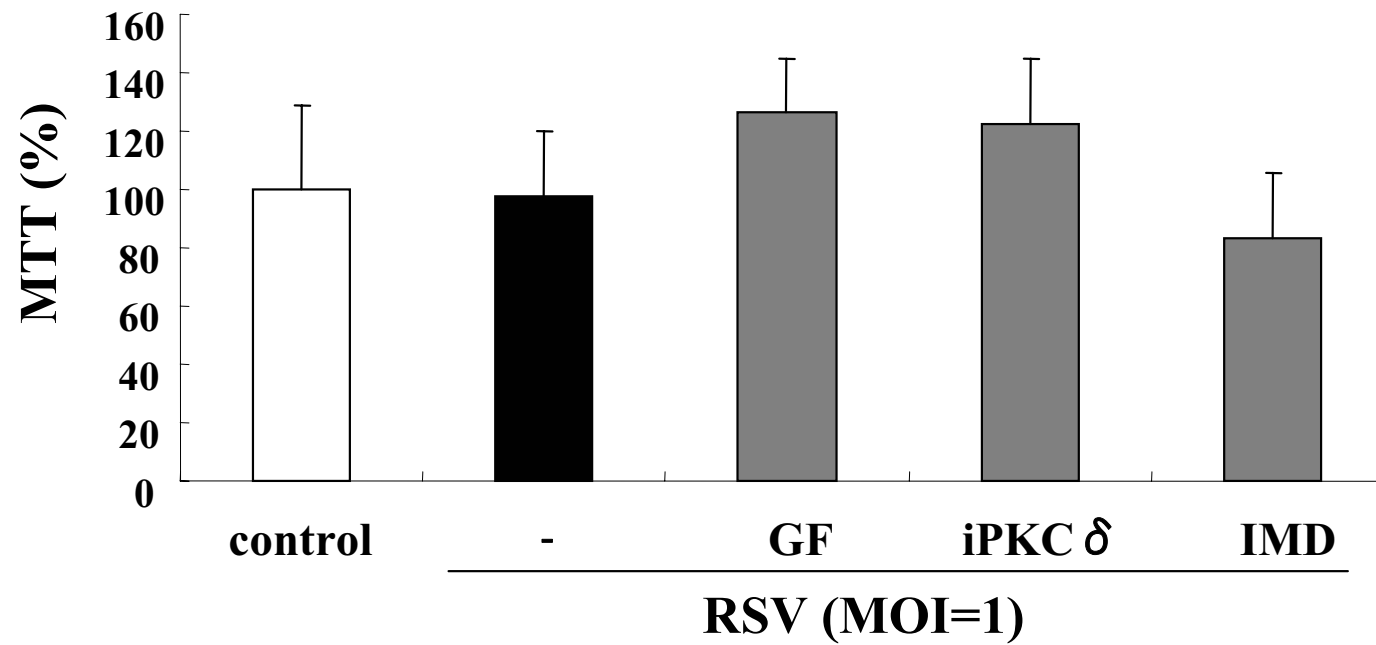

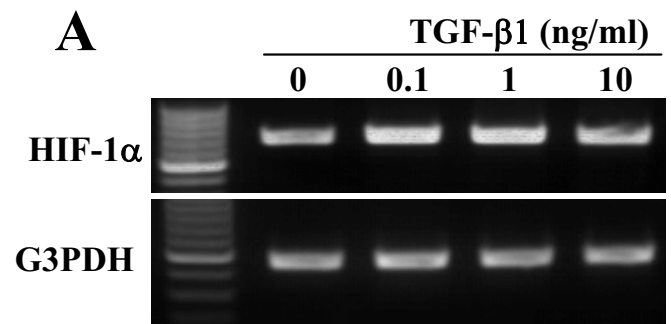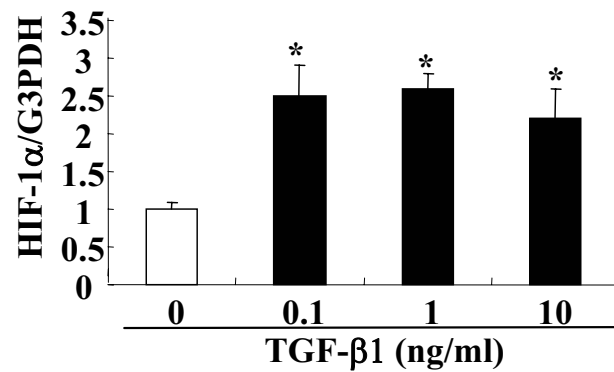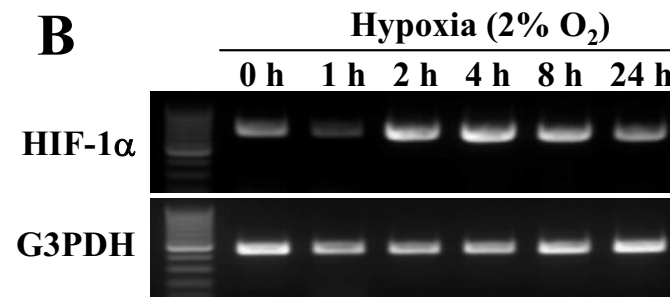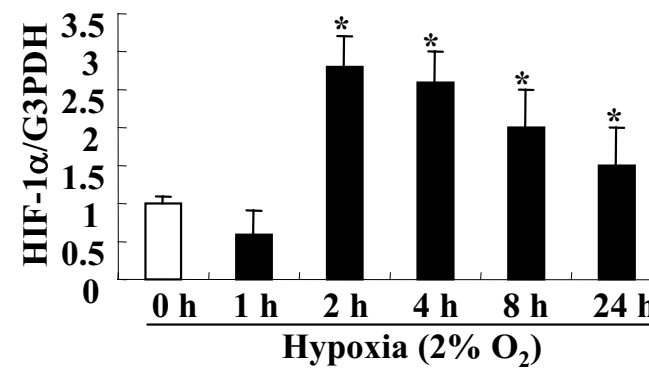

**A**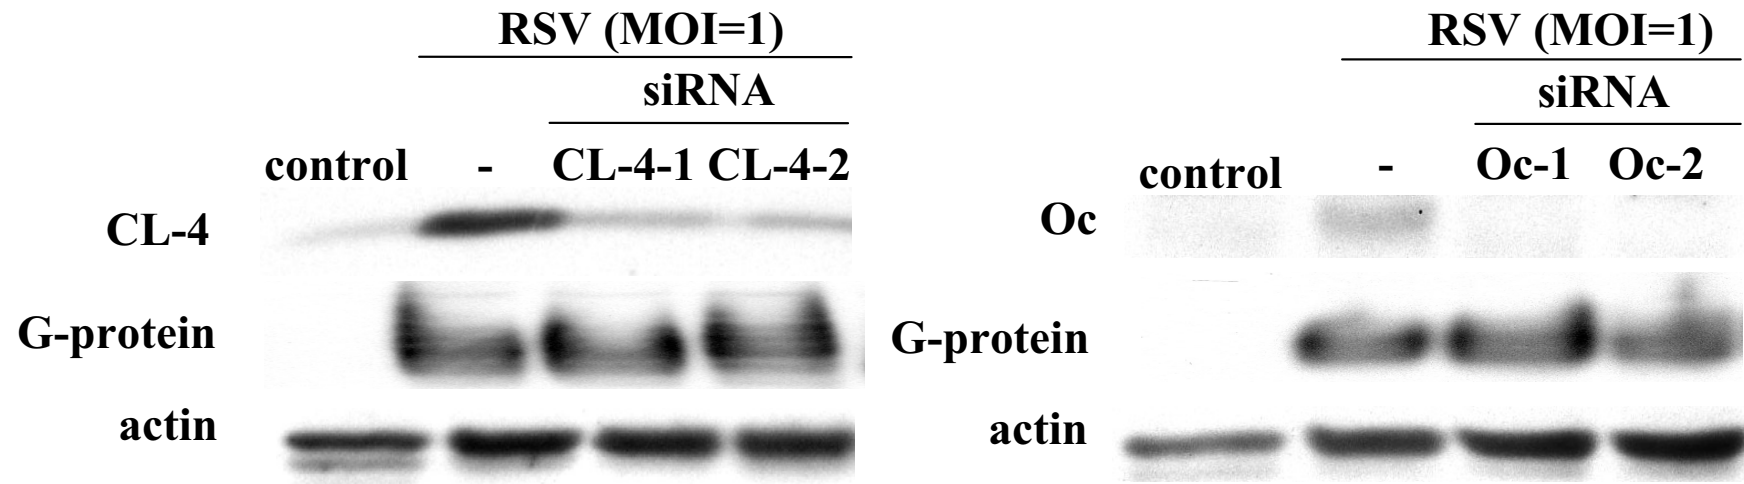**B**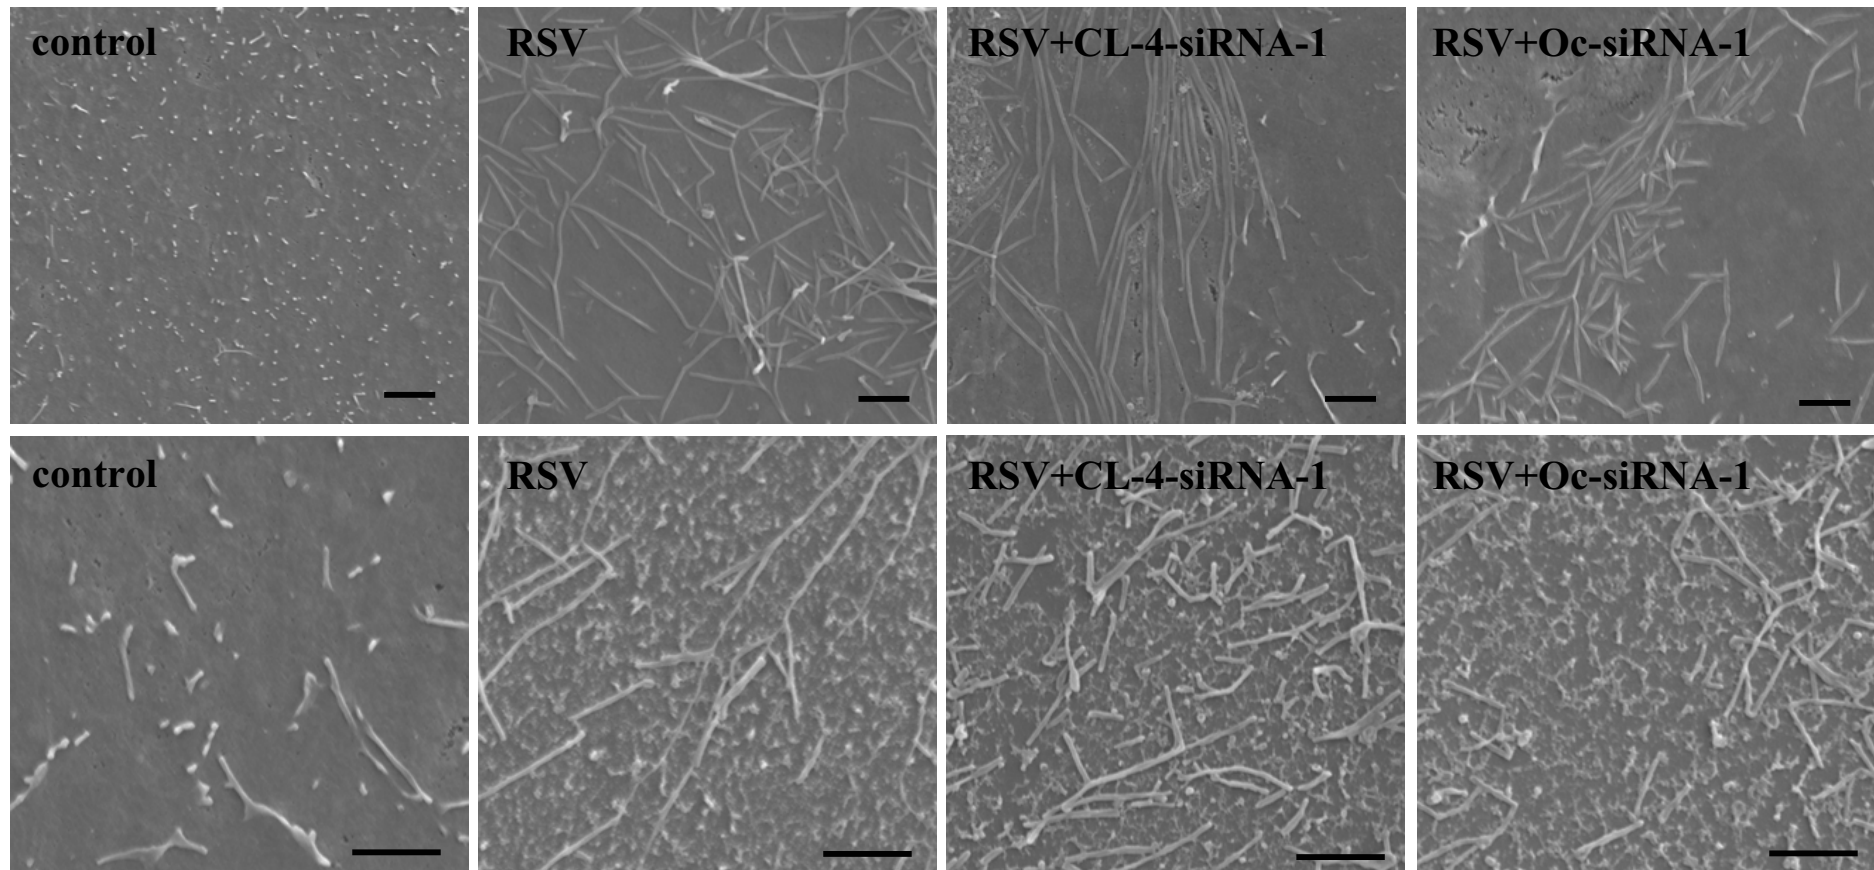

Supplement: E10-11-0875_1.pdf [file E10-11-0875_1.pdf]
